# Supplementary material for: Addition of dithi(ol)anylium tetrafluoroborates to α,β-unsaturated ketones
Source: publisher site journal article supplement (doi:10.3762/bjoc.14.37), 2018-02-26
Supplement: Additional file 3 [file 1860-5397-14-37-S3.xlsx]

## Sheet: ELN Report Reaction List
Article			DOI
Huang, Y.-C.; Nguyen, A.; Gräßle, S.; Vanderheiden, S.; Jung, N.; Bräse, S. Beilstein J. Org. Chem. 2018, 14, 515–522			doi:10.3762/bjoc.14.37
Label	Image	Name	InChI	InChIKey	Long-RInChIKey	Web-RInChIKey	Short-RInChIKey	Link
4a		5-(1,3-dithiolan-2-ylidene)-5-phenylpentan-2-one	InChI=1S/C14H16OS2/c1-11(15)7-8-13(14-16-9-10-17-14)12-5-3-2-4-6-12/h2-6H,7-10H2,1H3	LXKWSUYFYQCLRX-UHFFFAOYSA-N	Long-RInChIKey=SA-FUHFF-FVUQLWLRRQJZCK-UHFFFAOYSA-N--LXKWSUYFYQCLRX-UHFFFAOYSA-N--WEVYAHXRMPXWCK-UHFFFAOYSA-N-FUSUHKVFWTUUBE-UHFFFAOYSA-N	Web-RInChIKey=MXHQZQCWBJKSEZYBC-NUHFFFADPSCTJSA	Short-RInChIKey=SA-FUHFF-FVUQLWLRRQ-LXKWSUYFYQ-UJZHPBQGDC-NUHFF-NUHFF-NUHFF-ZZZ	https://www.beilstein-journals.org/bjoc/articles/14/37#S2
5a		5-(1,3-dithian-2-ylidene)-5-phenylpentan-2-one	InChI=1S/C15H18OS2/c1-12(16)8-9-14(13-6-3-2-4-7-13)15-17-10-5-11-18-15/h2-4,6-7H,5,8-11H2,1H3	HLVFYRZSXYKKMF-UHFFFAOYSA-N	Long-RInChIKey=SA-FUHFF-BHINIDDJDWBSFF-UHFFFAOYSA-N--HLVFYRZSXYKKMF-UHFFFAOYSA-N--WEVYAHXRMPXWCK-UHFFFAOYSA-N-FUSUHKVFWTUUBE-UHFFFAOYSA-N	Web-RInChIKey=JYMIOQUUCNHWHIQNE-NUHFFFADPSCTJSA	Short-RInChIKey=SA-FUHFF-BHINIDDJDW-HLVFYRZSXY-UJZHPBQGDC-NUHFF-NUHFF-NUHFF-ZZZ	https://www.beilstein-journals.org/bjoc/articles/14/37#S2
4b		6-(1,3-dithiolan-2-ylidene)-6-phenylhexan-3-one	InChI=1S/C15H18OS2/c1-2-13(16)8-9-14(15-17-10-11-18-15)12-6-4-3-5-7-12/h3-7H,2,8-11H2,1H3	MQHLDGLJNBYOQQ-UHFFFAOYSA-N	Long-RInChIKey=SA-FUHFF-FVUQLWLRRQJZCK-UHFFFAOYSA-N--MQHLDGLJNBYOQQ-UHFFFAOYSA-N--WEVYAHXRMPXWCK-UHFFFAOYSA-N-JLIDVCMBCGBIEY-UHFFFAOYSA-N	Web-RInChIKey=LXTULCCVPHDYQRDCV-NUHFFFADPSCTJSA	Short-RInChIKey=SA-FUHFF-FVUQLWLRRQ-MQHLDGLJNB-GOQWUCBPXP-NUHFF-NUHFF-NUHFF-ZZZ	https://www.beilstein-journals.org/bjoc/articles/14/37#S2
5b		6-(1,3-dithian-2-ylidene)-6-phenylhexan-3-one	InChI=1S/C16H20OS2/c1-2-14(17)9-10-15(13-7-4-3-5-8-13)16-18-11-6-12-19-16/h3-5,7-8H,2,6,9-12H2,1H3	YMTMOMPRUVRPTP-UHFFFAOYSA-N	Long-RInChIKey=SA-FUHFF-BHINIDDJDWBSFF-UHFFFAOYSA-N--YMTMOMPRUVRPTP-UHFFFAOYSA-N--WEVYAHXRMPXWCK-UHFFFAOYSA-N-JLIDVCMBCGBIEY-UHFFFAOYSA-N	Web-RInChIKey=XWJRINFRGMDKPZPAV-NUHFFFADPSCTJSA	Short-RInChIKey=SA-FUHFF-BHINIDDJDW-YMTMOMPRUV-GOQWUCBPXP-NUHFF-NUHFF-NUHFF-ZZZ	https://www.beilstein-journals.org/bjoc/articles/14/37#S2
4c		5-(1,3-dithiolan-2-ylidene)-4-methyl-5-phenylpentan-2-one	InChI=1S/C15H18OS2/c1-11(10-12(2)16)14(15-17-8-9-18-15)13-6-4-3-5-7-13/h3-7,11H,8-10H2,1-2H3	RCALJRZMLQRHLX-UHFFFAOYSA-N	Long-RInChIKey=SA-FUHFF-FVUQLWLRRQJZCK-UHFFFAOYSA-N--RCALJRZMLQRHLX-UHFFFAOYSA-N--WEVYAHXRMPXWCK-UHFFFAOYSA-N-JLIDVCMBCGBIEY-UHFFFAOYSA-N	Web-RInChIKey=KEQNUWXMCKEWBQSTG-NUHFFFADPSCTJSA	Short-RInChIKey=SA-FUHFF-FVUQLWLRRQ-RCALJRZMLQ-GOQWUCBPXP-NUHFF-NUHFF-NUHFF-ZZZ	https://www.beilstein-journals.org/bjoc/articles/14/37#S2
5c		5-(1,3-dithian-2-ylidene)-4-methyl-5-phenylpentan-2-one	InChI=1S/C16H20OS2/c1-12(11-13(2)17)15(14-7-4-3-5-8-14)16-18-9-6-10-19-16/h3-5,7-8,12H,6,9-11H2,1-2H3	MSEWRYWMSSBPBP-UHFFFAOYSA-N	Long-RInChIKey=SA-FUHFF-BHINIDDJDWBSFF-UHFFFAOYSA-N--MSEWRYWMSSBPBP-UHFFFAOYSA-N--WEVYAHXRMPXWCK-UHFFFAOYSA-N-JLIDVCMBCGBIEY-UHFFFAOYSA-N	Web-RInChIKey=ZIXPRYYKPQIJTJYHH-NUHFFFADPSCTJSA	Short-RInChIKey=SA-FUHFF-BHINIDDJDW-MSEWRYWMSS-GOQWUCBPXP-NUHFF-NUHFF-NUHFF-ZZZ	https://www.beilstein-journals.org/bjoc/articles/14/37#S2
4d		6-(1,3-dithiolan-2-ylidene)-5-methyl-6-phenylhexan-3-one	InChI=1S/C16H20OS2/c1-3-14(17)11-12(2)15(16-18-9-10-19-16)13-7-5-4-6-8-13/h4-8,12H,3,9-11H2,1-2H3	GQDXLOBJYIWLJL-UHFFFAOYSA-N	Long-RInChIKey=SA-FUHFF-FVUQLWLRRQJZCK-UHFFFAOYSA-N--GQDXLOBJYIWLJL-UHFFFAOYSA-N--WEVYAHXRMPXWCK-UHFFFAOYSA-N-FEWIGMWODIRUJM-HWKANZROSA-N	Web-RInChIKey=GCCWRIPAFUSAGTKFI-NYUSWPPMLVGMNSA	Short-RInChIKey=SA-FUHFF-FVUQLWLRRQ-GQDXLOBJYI-DFAPGRGNUF-NUHFF-NUHFF-NYUSW-ZZZ	https://www.beilstein-journals.org/bjoc/articles/14/37#S2
5d		6-(1,3-dithian-2-ylidene)-5-methyl-6-phenylhexan-3-one	InChI=1S/C17H22OS2/c1-3-15(18)12-13(2)16(14-8-5-4-6-9-14)17-19-10-7-11-20-17/h4-6,8-9,13H,3,7,10-12H2,1-2H3	GIVITTWYMCQGJB-UHFFFAOYSA-N	Long-RInChIKey=SA-FUHFF-BHINIDDJDWBSFF-UHFFFAOYSA-N--GIVITTWYMCQGJB-UHFFFAOYSA-N--WEVYAHXRMPXWCK-UHFFFAOYSA-N-FEWIGMWODIRUJM-HWKANZROSA-N	Web-RInChIKey=YSIMTALRNOEPIUQGG-NYUSWPPMLVGMNSA	Short-RInChIKey=SA-FUHFF-BHINIDDJDW-GIVITTWYMC-DFAPGRGNUF-NUHFF-NUHFF-NYUSW-ZZZ	https://www.beilstein-journals.org/bjoc/articles/14/37#S2
4e		4-((1,3-Dithiolan-2-ylidene)(phenyl)methyl)-5-methylhexan-2-one	InChI=1S/C17H22OS2/c1-12(2)15(11-13(3)18)16(17-19-9-10-20-17)14-7-5-4-6-8-14/h4-8,12,15H,9-11H2,1-3H3	AJUPULBPXRSZPK-UHFFFAOYSA-N	Long-RInChIKey=SA-FUHFF-FVUQLWLRRQJZCK-UHFFFAOYSA-N--AJUPULBPXRSZPK-UHFFFAOYSA-N--WEVYAHXRMPXWCK-UHFFFAOYSA-N-IYMKNYVCXUEFJE-SNAWJCMRSA-N	Web-RInChIKey=OPFBRYWFFWEJRRKGJ-NIEKNUMXMTBCPSA	Short-RInChIKey=SA-FUHFF-FVUQLWLRRQ-AJUPULBPXR-GWVHZPNOTS-NUHFF-NUHFF-NIEKN-ZZZ	https://www.beilstein-journals.org/bjoc/articles/14/37#S2
4f		4-((1,3-dithiolan-2-ylidene)(phenyl)methyl)octan-2-one	InChI=1S/C18H24OS2/c1-3-4-8-16(13-14(2)19)17(18-20-11-12-21-18)15-9-6-5-7-10-15/h5-7,9-10,16H,3-4,8,11-13H2,1-2H3	XLPWXCGXHOGTNX-UHFFFAOYSA-N	Long-RInChIKey=SA-FUHFF-FVUQLWLRRQJZCK-UHFFFAOYSA-N--XLPWXCGXHOGTNX-UHFFFAOYSA-N--WEVYAHXRMPXWCK-UHFFFAOYSA-N-ZCFOBLITZWHNNC-VOTSOKGWSA-N	Web-RInChIKey=ILPFQRRTQNMDQQRZZ-NZMGPZXJRJOMWSA	Short-RInChIKey=SA-FUHFF-FVUQLWLRRQ-XLPWXCGXHO-VZXIHVCMOK-NUHFF-NUHFF-NZMGP-ZZZ	https://www.beilstein-journals.org/bjoc/articles/14/37#S2
5f		4-((1,3-dithian-2-ylidene)(phenyl)methyl)octan-2-one	InChI=1S/C19H26OS2/c1-3-4-9-17(14-15(2)20)18(16-10-6-5-7-11-16)19-21-12-8-13-22-19/h5-7,10-11,17H,3-4,8-9,12-14H2,1-2H3	UOHJUSHNULFLRZ-UHFFFAOYSA-N	Long-RInChIKey=SA-FUHFF-BHINIDDJDWBSFF-UHFFFAOYSA-N--UOHJUSHNULFLRZ-UHFFFAOYSA-N--WEVYAHXRMPXWCK-UHFFFAOYSA-N-ZCFOBLITZWHNNC-VOTSOKGWSA-N	Web-RInChIKey=LPGSOJAHMWMDPPINL-NZMGPZXJRJOMWSA	Short-RInChIKey=SA-FUHFF-BHINIDDJDW-UOHJUSHNUL-VZXIHVCMOK-NUHFF-NUHFF-NZMGP-ZZZ	https://www.beilstein-journals.org/bjoc/articles/14/37#S2
4g		(E)-5-(1,3-dithiolan-2-yl)-4,5-diphenylpent-4-en-2-one	InChI=1S/C20H20OS2/c1-15(21)14-18(16-8-4-2-5-9-16)19(20-22-12-13-23-20)17-10-6-3-7-11-17/h2-11,18H,12-14H2,1H3	LRVYWKBWOILOMV-UHFFFAOYSA-N	Long-RInChIKey=SA-FUHFF-FVUQLWLRRQJZCK-UHFFFAOYSA-N--LRVYWKBWOILOMV-UHFFFAOYSA-N--BWHOZHOGCMHOBV-BQYQJAHWSA-N-WEVYAHXRMPXWCK-UHFFFAOYSA-N	Web-RInChIKey=IQAWKJCTYXDDAGCAG-NPRROABNYKIANSA	Short-RInChIKey=SA-FUHFF-FVUQLWLRRQ-LRVYWKBWOI-DCEOUSSQAC-NUHFF-NUHFF-NINFL-ZZZ	https://www.beilstein-journals.org/bjoc/articles/14/37#S2
5g		(E)-5-(1,3-dithian-2-yl)-4,5-diphenylpent-4-en-2-one	InChI=1S/C21H22OS2/c1-16(22)15-19(17-9-4-2-5-10-17)20(18-11-6-3-7-12-18)21-23-13-8-14-24-21/h2-7,9-12,19H,8,13-15H2,1H3	KDMUVXXDJMVQGI-UHFFFAOYSA-N	Long-RInChIKey=SA-FUHFF-BHINIDDJDWBSFF-UHFFFAOYSA-N--KDMUVXXDJMVQGI-UHFFFAOYSA-N--BWHOZHOGCMHOBV-BQYQJAHWSA-N-WEVYAHXRMPXWCK-UHFFFAOYSA-N	Web-RInChIKey=LCRTWENZITXHKVAZP-NPRROABNYKIANSA	Short-RInChIKey=SA-FUHFF-BHINIDDJDW-KDMUVXXDJM-DCEOUSSQAC-NUHFF-NUHFF-NINFL-ZZZ	https://www.beilstein-journals.org/bjoc/articles/14/37#S2
4h		(E)-4-(1,3-dithiolan-2-yl)-1,3,4-triphenylbut-3-en-1-one	InChI=1S/C25H22OS2/c26-23(20-12-6-2-7-13-20)18-22(19-10-4-1-5-11-19)24(25-27-16-17-28-25)21-14-8-3-9-15-21/h1-15,22H,16-18H2	GEPFNJDSCKCSTO-UHFFFAOYSA-N	Long-RInChIKey=SA-FUHFF-FVUQLWLRRQJZCK-UHFFFAOYSA-N--GEPFNJDSCKCSTO-UHFFFAOYSA-N--DQFBYFPFKXHELB-VAWYXSNFSA-N-WEVYAHXRMPXWCK-UHFFFAOYSA-N	Web-RInChIKey=CHUVSOMTESOPEENYY-NJTHQDAHCPOBRSA	Short-RInChIKey=SA-FUHFF-FVUQLWLRRQ-GEPFNJDSCK-QRKBGNDQPR-NUHFF-NUHFF-NCFNA-ZZZ	https://www.beilstein-journals.org/bjoc/articles/14/37#S2
5h		(E)-4-(1,3-dithian-2-yl)-1,3,4-triphenylbut-3-en-1-one	InChI=1S/C26H24OS2/c27-24(21-13-6-2-7-14-21)19-23(20-11-4-1-5-12-20)25(22-15-8-3-9-16-22)26-28-17-10-18-29-26/h1-9,11-16,23H,10,17-19H2	ZUDKFLLVQMXJBO-UHFFFAOYSA-N	Long-RInChIKey=SA-FUHFF-BHINIDDJDWBSFF-UHFFFAOYSA-N--ZUDKFLLVQMXJBO-UHFFFAOYSA-N--DQFBYFPFKXHELB-VAWYXSNFSA-N-WEVYAHXRMPXWCK-UHFFFAOYSA-N	Web-RInChIKey=FXRBZUOPROPMOZQCR-NJTHQDAHCPOBRSA	Short-RInChIKey=SA-FUHFF-BHINIDDJDW-ZUDKFLLVQM-QRKBGNDQPR-NUHFF-NUHFF-NCFNA-ZZZ	https://www.beilstein-journals.org/bjoc/articles/14/37#S2
4i		6-(1,3-dithiolan-2-ylidene)-5-methylheptan-3-one	InChI=1S/C11H18OS2/c1-4-10(12)7-8(2)9(3)11-13-5-6-14-11/h8H,4-7H2,1-3H3	AGKKZIFNAVODRD-UHFFFAOYSA-N	Long-RInChIKey=SA-BUHFF-AGKKZIFNAVODRD-UHFFFAOYSA-N--QCFGFTJKHKCOOH-UHFFFAOYSA-N--WEVYAHXRMPXWCK-UHFFFAOYSA-N-FEWIGMWODIRUJM-HWKANZROSA-N	Web-RInChIKey=GBKKGBNSBFOLNLGYH-NYUSWPPMLVGMNSA	Short-RInChIKey=SA-BUHFF-AGKKZIFNAV-QCFGFTJKHK-DFAPGRGNUF-NUHFF-NUHFF-NYUSW-ZZZ	https://www.beilstein-journals.org/bjoc/articles/14/37#S2
5i		6-(1,3-dithian-2-ylidene)-5-methylheptan-3-one	InChI=1S/C12H20OS2/c1-4-11(13)8-9(2)10(3)12-14-6-5-7-15-12/h9H,4-8H2,1-3H3	UEBNFWJRYWYELY-UHFFFAOYSA-N	Long-RInChIKey=SA-BUHFF-UEBNFWJRYWYELY-UHFFFAOYSA-N--ASRVTQYPLUHROH-UHFFFAOYSA-N--WEVYAHXRMPXWCK-UHFFFAOYSA-N-FEWIGMWODIRUJM-HWKANZROSA-N	Web-RInChIKey=DQTKQGZEGVIDKHFRZ-NBYZWMAHKLZBOSA	Short-RInChIKey=SA-BUHFF-UEBNFWJRYW-ASRVTQYPLU-DFAPGRGNUF-NUHFF-NUHFF-NYUSW-ZZZ	https://www.beilstein-journals.org/bjoc/articles/14/37#S2
4j		4-(1-(1,3-dithiolan-2-ylidene)ethyl)-5-methylhexan-2-one	InChI=1S/C12H20OS2/c1-8(2)11(7-9(3)13)10(4)12-14-5-6-15-12/h8,11H,5-7H2,1-4H3	LBBLNZCUATYWIS-UHFFFAOYSA-N	Long-RInChIKey=SA-BUHFF-LBBLNZCUATYWIS-UHFFFAOYSA-N--QCFGFTJKHKCOOH-UHFFFAOYSA-N--WEVYAHXRMPXWCK-UHFFFAOYSA-N-IYMKNYVCXUEFJE-SNAWJCMRSA-N	Web-RInChIKey=SVLKCJRHYXTIDBHXC-NIEKNUMXMTBCPSA	Short-RInChIKey=SA-BUHFF-LBBLNZCUAT-QCFGFTJKHK-GWVHZPNOTS-NUHFF-NUHFF-NIEKN-ZZZ	https://www.beilstein-journals.org/bjoc/articles/14/37#S2
4k		4-(1-(1,3-dithiolan-2-ylidene)ethyl)octan-2-one	InChI=1S/C13H22OS2/c1-4-5-6-12(9-10(2)14)11(3)13-15-7-8-16-13/h12H,4-9H2,1-3H3	OOWHPIJVOYHULD-UHFFFAOYSA-N	Long-RInChIKey=SA-BUHFF-OOWHPIJVOYHULD-UHFFFAOYSA-N--QCFGFTJKHKCOOH-UHFFFAOYSA-N--WEVYAHXRMPXWCK-UHFFFAOYSA-N-ZCFOBLITZWHNNC-VOTSOKGWSA-N	Web-RInChIKey=IAFYBPGORHRNEWTXI-NZMGPZXJRJOMWSA	Short-RInChIKey=SA-BUHFF-OOWHPIJVOY-QCFGFTJKHK-VZXIHVCMOK-NUHFF-NUHFF-NZMGP-ZZZ	https://www.beilstein-journals.org/bjoc/articles/14/37#S2
4l		5-(1,3-dithiolan-2-ylidene)-4-phenylhexan-2-one	InChI=1S/C15H18OS2/c1-11(16)10-14(13-6-4-3-5-7-13)12(2)15-17-8-9-18-15/h3-7,14H,8-10H2,1-2H3	VWZGXEMKFJLYLX-UHFFFAOYSA-N	Long-RInChIKey=SA-BUHFF-VWZGXEMKFJLYLX-UHFFFAOYSA-N--QCFGFTJKHKCOOH-UHFFFAOYSA-N--BWHOZHOGCMHOBV-BQYQJAHWSA-N-WEVYAHXRMPXWCK-UHFFFAOYSA-N	Web-RInChIKey=NOTNHMBGUAJNLJSOJ-NPRROABNYKIANSA	Short-RInChIKey=SA-BUHFF-VWZGXEMKFJ-QCFGFTJKHK-DCEOUSSQAC-NUHFF-NUHFF-NINFL-ZZZ	https://www.beilstein-journals.org/bjoc/articles/14/37#S2
4m		6-(1,3-dithiolan-2-ylidene)octan-3-one	InChI=1S/C11H18OS2/c1-3-9(5-6-10(12)4-2)11-13-7-8-14-11/h3-8H2,1-2H3	YDJFXLVHPNACDY-UHFFFAOYSA-N	Long-RInChIKey=SA-BUHFF-YDJFXLVHPNACDY-UHFFFAOYSA-N--RVLGVKMYDGKUJI-UHFFFAOYSA-N--WEVYAHXRMPXWCK-UHFFFAOYSA-N-JLIDVCMBCGBIEY-UHFFFAOYSA-N	Web-RInChIKey=LEINWHFCTHTGLPIUB-NUHFFFADPSCTJSA	Short-RInChIKey=SA-BUHFF-YDJFXLVHPN-RVLGVKMYDG-GOQWUCBPXP-NUHFF-NUHFF-NUHFF-ZZZ	https://www.beilstein-journals.org/bjoc/articles/14/37#S2
4n		6-(1,3-dithiolan-2-ylidene)-5-methyloctan-3-one	InChI=1S/C12H20OS2/c1-4-10(13)8-9(3)11(5-2)12-14-6-7-15-12/h9H,4-8H2,1-3H3	HNEMFLNWZMGKBV-UHFFFAOYSA-N	Long-RInChIKey=SA-BUHFF-HNEMFLNWZMGKBV-UHFFFAOYSA-N--RVLGVKMYDGKUJI-UHFFFAOYSA-N--WEVYAHXRMPXWCK-UHFFFAOYSA-N-FEWIGMWODIRUJM-HWKANZROSA-N	Web-RInChIKey=FGMGPPUIKUERSIBEP-NBYZWMAHKLZBOSA	Short-RInChIKey=SA-BUHFF-HNEMFLNWZM-RVLGVKMYDG-DFAPGRGNUF-NUHFF-NUHFF-NYUSW-ZZZ	https://www.beilstein-journals.org/bjoc/articles/14/37#S2
4o		5-(1,3-dithiolan-2-ylidene)-4-isopropylheptan-2-one	InChI=1S/C13H22OS2/c1-5-11(13-15-6-7-16-13)12(9(2)3)8-10(4)14/h9,12H,5-8H2,1-4H3	FYEONQBYGJVCGM-UHFFFAOYSA-N	Long-RInChIKey=SA-BUHFF-FYEONQBYGJVCGM-UHFFFAOYSA-N--RVLGVKMYDGKUJI-UHFFFAOYSA-N--WEVYAHXRMPXWCK-UHFFFAOYSA-N-IYMKNYVCXUEFJE-SNAWJCMRSA-N	Web-RInChIKey=PDCBICBVIZTCSADOZ-NIEKNUMXMTBCPSA	Short-RInChIKey=SA-BUHFF-FYEONQBYGJ-RVLGVKMYDG-GWVHZPNOTS-NUHFF-NUHFF-NIEKN-ZZZ	https://www.beilstein-journals.org/bjoc/articles/14/37#S2
4p		4-(1-(1,3-Dithiolan-2-ylidene)propyl)octan-2-one	InChI=1S/C14H24OS2/c1-4-6-7-12(10-11(3)15)13(5-2)14-16-8-9-17-14/h12H,4-10H2,1-3H3	KDAUXNCFMLRQRP-UHFFFAOYSA-N	Long-RInChIKey=SA-BUHFF-KDAUXNCFMLRQRP-UHFFFAOYSA-N--RVLGVKMYDGKUJI-UHFFFAOYSA-N--WEVYAHXRMPXWCK-UHFFFAOYSA-N-ZCFOBLITZWHNNC-VOTSOKGWSA-N	Web-RInChIKey=YNFJGCACSSYLGDREE-NZMGPZXJRJOMWSA	Short-RInChIKey=SA-BUHFF-KDAUXNCFML-RVLGVKMYDG-VZXIHVCMOK-NUHFF-NUHFF-NZMGP-ZZZ	https://www.beilstein-journals.org/bjoc/articles/14/37#S2
4q		4-(1,3-dithiolan-2-ylidene)-1,3-diphenylhexan-1-one	InChI=1S/C21H22OS2/c1-2-18(21-23-13-14-24-21)19(16-9-5-3-6-10-16)15-20(22)17-11-7-4-8-12-17/h3-12,19H,2,13-15H2,1H3	FFNUZHPVLBYLFF-UHFFFAOYSA-N	Long-RInChIKey=SA-BUHFF-FFNUZHPVLBYLFF-UHFFFAOYSA-N--RVLGVKMYDGKUJI-UHFFFAOYSA-N--DQFBYFPFKXHELB-VAWYXSNFSA-N-WEVYAHXRMPXWCK-UHFFFAOYSA-N	Web-RInChIKey=AJTHDFWRMNUGBHKIO-NZZCCZGXFSIXZSA	Short-RInChIKey=SA-BUHFF-FFNUZHPVLB-RVLGVKMYDG-QRKBGNDQPR-NUHFF-NUHFF-NCFNA-ZZZ	https://www.beilstein-journals.org/bjoc/articles/14/37#S2
5r		Methyl 2-(1,3-dithian-2-ylidene)-3-methyl-5-oxoheptanoate	InChI=1S/C13H20O3S2/c1-4-10(14)8-9(2)11(12(15)16-3)13-17-6-5-7-18-13/h9H,4-8H2,1-3H3	SLOZNFFLELWBBW-UHFFFAOYSA-N	Long-RInChIKey=SA-BUHFF-SLOZNFFLELWBBW-UHFFFAOYSA-N--AEUBEYKEFRNHKB-UHFFFAOYSA-N--WEVYAHXRMPXWCK-UHFFFAOYSA-N-FEWIGMWODIRUJM-HWKANZROSA-N	Web-RInChIKey=IJETYGZZQRHTTRXVH-NBYZWMAHKLZBOSA	Short-RInChIKey=SA-BUHFF-SLOZNFFLEL-AEUBEYKEFR-DFAPGRGNUF-NUHFF-NUHFF-NYUSW-ZZZ	https://www.beilstein-journals.org/bjoc/articles/14/37#S2
9a		3-((1,3-dithiolan-2-ylidene)(phenyl)methyl)cyclopentan-1-one	InChI=1S/C15H16OS2/c16-13-7-6-12(10-13)14(15-17-8-9-18-15)11-4-2-1-3-5-11/h1-5,12H,6-10H2	LOEMJXFENGAIRJ-UHFFFAOYSA-N	Long-RInChIKey=SA-FUHFF-FVUQLWLRRQJZCK-UHFFFAOYSA-N--LOEMJXFENGAIRJ-UHFFFAOYSA-N--WEVYAHXRMPXWCK-UHFFFAOYSA-N-BZKFMUIJRXWWQK-UHFFFAOYSA-N	Web-RInChIKey=MWVVFLOFCWKOATYQS-NUHFFFADPSCTJSA	Short-RInChIKey=SA-FUHFF-FVUQLWLRRQ-LOEMJXFENG-UUIAKDWQTA-NUHFF-NUHFF-NUHFF-ZZZ	https://www.beilstein-journals.org/bjoc/articles/14/37#S3
10a		3-((1,3-dithian-2-ylidene)(phenyl)methyl)cyclopentan-1-one	InChI=1S/C16H18OS2/c17-14-8-7-13(11-14)15(12-5-2-1-3-6-12)16-18-9-4-10-19-16/h1-3,5-6,13H,4,7-11H2	RUNYTOSEZSUNGD-UHFFFAOYSA-N	Long-RInChIKey=SA-FUHFF-BHINIDDJDWBSFF-UHFFFAOYSA-N--RUNYTOSEZSUNGD-UHFFFAOYSA-N--WEVYAHXRMPXWCK-UHFFFAOYSA-N-BZKFMUIJRXWWQK-UHFFFAOYSA-N	Web-RInChIKey=XTZPZFHEAHKIOFWSX-NUHFFFADPSCTJSA	Short-RInChIKey=SA-FUHFF-BHINIDDJDW-RUNYTOSEZS-UUIAKDWQTA-NUHFF-NUHFF-NUHFF-ZZZ	https://www.beilstein-journals.org/bjoc/articles/14/37#S3
9b		3-((1,3-dithiolan-2-ylidene)(phenyl)methyl)cyclohexan-1-one	InChI=1S/C16H18OS2/c17-14-8-4-7-13(11-14)15(16-18-9-10-19-16)12-5-2-1-3-6-12/h1-3,5-6,13H,4,7-11H2	XDXILYAJVPWYNR-UHFFFAOYSA-N	Long-RInChIKey=SA-FUHFF-FVUQLWLRRQJZCK-UHFFFAOYSA-N--XDXILYAJVPWYNR-UHFFFAOYSA-N--WEVYAHXRMPXWCK-UHFFFAOYSA-N-FWFSEYBSWVRWGL-UHFFFAOYSA-N	Web-RInChIKey=FCVJHAVJOGJOBIMSW-NUHFFFADPSCTJSA	Short-RInChIKey=SA-FUHFF-FVUQLWLRRQ-XDXILYAJVP-QESJBLBJYC-NUHFF-NUHFF-NUHFF-ZZZ	https://www.beilstein-journals.org/bjoc/articles/14/37#S3
10b		3-((1,3-dithian-2-ylidene)(phenyl)methyl)cyclohexan-1-one	InChI=1S/C17H20OS2/c18-15-9-4-8-14(12-15)16(13-6-2-1-3-7-13)17-19-10-5-11-20-17/h1-3,6-7,14H,4-5,8-12H2	DBMRDQGRCWFNNO-UHFFFAOYSA-N	Long-RInChIKey=SA-FUHFF-BHINIDDJDWBSFF-UHFFFAOYSA-N--DBMRDQGRCWFNNO-UHFFFAOYSA-N--WEVYAHXRMPXWCK-UHFFFAOYSA-N-FWFSEYBSWVRWGL-UHFFFAOYSA-N	Web-RInChIKey=HBOPJLHNBSHWRIDHZ-NUHFFFADPSCTJSA	Short-RInChIKey=SA-FUHFF-BHINIDDJDW-DBMRDQGRCW-QESJBLBJYC-NUHFF-NUHFF-NUHFF-ZZZ	https://www.beilstein-journals.org/bjoc/articles/14/37#S3
9c		3-(1-(1,3-dithiolan-2-ylidene)ethyl)cyclopentan-1-one	InChI=1S/C10H14OS2/c1-7(10-12-4-5-13-10)8-2-3-9(11)6-8/h8H,2-6H2,1H3	QPWUQJGOQDXGSQ-UHFFFAOYSA-N	Long-RInChIKey=SA-BUHFF-QPWUQJGOQDXGSQ-UHFFFAOYSA-N--QCFGFTJKHKCOOH-UHFFFAOYSA-N--WEVYAHXRMPXWCK-UHFFFAOYSA-N-BZKFMUIJRXWWQK-UHFFFAOYSA-N	Web-RInChIKey=GVPOTBNOWXGSDFOHI-NUHFFFADPSCTJSA	Short-RInChIKey=SA-BUHFF-QPWUQJGOQD-QCFGFTJKHK-UUIAKDWQTA-NUHFF-NUHFF-NUHFF-ZZZ	https://www.beilstein-journals.org/bjoc/articles/14/37#S3
10c		3-(1-(1,3-dithiolan-2-ylidene)ethyl)cyclohexan-1-one	InChI=1S/C11H16OS2/c1-8(9-3-4-10(12)7-9)11-13-5-2-6-14-11/h9H,2-7H2,1H3	WQJQUKJBHBQXMD-UHFFFAOYSA-N	Long-RInChIKey=SA-BUHFF-WQJQUKJBHBQXMD-UHFFFAOYSA-N--ASRVTQYPLUHROH-UHFFFAOYSA-N--WEVYAHXRMPXWCK-UHFFFAOYSA-N-BZKFMUIJRXWWQK-UHFFFAOYSA-N	Web-RInChIKey=COIBLJUZIUFUGABRS-NUHFFFADPSCTJSA	Short-RInChIKey=SA-BUHFF-WQJQUKJBHB-ASRVTQYPLU-UUIAKDWQTA-NUHFF-NUHFF-NUHFF-ZZZ	https://www.beilstein-journals.org/bjoc/articles/14/37#S3
9d		3-(1-(1,3-dithiolan-2-ylidene)ethyl)cyclohexan-1-one	InChI=1S/C11H16OS2/c1-8(11-13-5-6-14-11)9-3-2-4-10(12)7-9/h9H,2-7H2,1H3	ZCSYABZYYYQJDH-UHFFFAOYSA-N	Long-RInChIKey=SA-BUHFF-ZCSYABZYYYQJDH-UHFFFAOYSA-N--QCFGFTJKHKCOOH-UHFFFAOYSA-N--WEVYAHXRMPXWCK-UHFFFAOYSA-N-WEVYAHXRMPXWCK-UHFFFAOYSA-N-FWFSEYBSWVRWGL-UHFFFAOYSA-N	Web-RInChIKey=RUWCTYVSFUTXOVMKD-NUHFFFADPSCTJSA	Short-RInChIKey=SA-BUHFF-ZCSYABZYYY-QCFGFTJKHK-VBPWSTGLFX-NUHFF-NUHFF-NUHFF-ZZZ	https://www.beilstein-journals.org/bjoc/articles/14/37#S3
9e		3-(1-(1,3-dithiolan-2-ylidene)propyl)cyclopentan-1-one	InChI=1S/C11H16OS2/c1-2-10(11-13-5-6-14-11)8-3-4-9(12)7-8/h8H,2-7H2,1H3	BTUSJJHTMUJDHS-UHFFFAOYSA-N	Long-RInChIKey=SA-BUHFF-BTUSJJHTMUJDHS-UHFFFAOYSA-N--RVLGVKMYDGKUJI-UHFFFAOYSA-N--WEVYAHXRMPXWCK-UHFFFAOYSA-N-BZKFMUIJRXWWQK-UHFFFAOYSA-N	Web-RInChIKey=YGWRIEGRMYILNEVTN-NUHFFFADPSCTJSA	Short-RInChIKey=SA-BUHFF-BTUSJJHTMU-RVLGVKMYDG-UUIAKDWQTA-NUHFF-NUHFF-NUHFF-ZZZ	https://www.beilstein-journals.org/bjoc/articles/14/37#S3
9f		3-(1-(1,3-dithiolan-2-ylidene)propyl)cyclohexan-1-one	InChI=1S/C12H18OS2/c1-2-11(12-14-6-7-15-12)9-4-3-5-10(13)8-9/h9H,2-8H2,1H3	LDEHBRRLPOXYNP-UHFFFAOYSA-N	Long-RInChIKey=SA-BUHFF-LDEHBRRLPOXYNP-UHFFFAOYSA-N--RVLGVKMYDGKUJI-UHFFFAOYSA-N--WEVYAHXRMPXWCK-UHFFFAOYSA-N-FWFSEYBSWVRWGL-UHFFFAOYSA-N	Web-RInChIKey=ABRUYVZOHOLMQKRUD-NUHFFFADPSCTJSA	Short-RInChIKey=SA-BUHFF-LDEHBRRLPO-RVLGVKMYDG-QESJBLBJYC-NUHFF-NUHFF-NUHFF-ZZZ	https://www.beilstein-journals.org/bjoc/articles/14/37#S3
10g		Methyl 2-(1,3-dithian-2-ylidene)-2-(3-oxocyclopentyl)	InChI=1S/C12H16O3S2/c1-15-11(14)10(8-3-4-9(13)7-8)12-16-5-2-6-17-12/h8H,2-7H2,1H3	LXIYELLFKPNDKG-UHFFFAOYSA-N	Long-RInChIKey=SA-BUHFF-LXIYELLFKPNDKG-UHFFFAOYSA-N--AEUBEYKEFRNHKB-UHFFFAOYSA-N--WEVYAHXRMPXWCK-UHFFFAOYSA-N-BZKFMUIJRXWWQK-UHFFFAOYSA-N	Web-RInChIKey=LUJMBHNEARAUDDVTY-NUHFFFADPSCTJSA	Short-RInChIKey=SA-BUHFF-LXIYELLFKP-AEUBEYKEFR-UUIAKDWQTA-NUHFF-NUHFF-NUHFF-ZZZ	https://www.beilstein-journals.org/bjoc/articles/14/37#S3
10h		Methyl 2-(1,3-dithian-2-ylidene)-2-(3-oxocyclohexyl)acetate	InChI=1S/C13H18O3S2/c1-16-12(15)11(13-17-6-3-7-18-13)9-4-2-5-10(14)8-9/h9H,2-8H2,1H3	AJGNXKNGUYYEFE-UHFFFAOYSA-N	Long-RInChIKey=SA-BUHFF-AJGNXKNGUYYEFE-UHFFFAOYSA-N--AEUBEYKEFRNHKB-UHFFFAOYSA-N--WEVYAHXRMPXWCK-UHFFFAOYSA-N-FWFSEYBSWVRWGL-UHFFFAOYSA-N	Web-RInChIKey=BCNKMGBTZWVYAAQYK-NUHFFFADPSCTJSA	Short-RInChIKey=SA-BUHFF-AJGNXKNGUY-AEUBEYKEFR-QESJBLBJYC-NUHFF-NUHFF-NUHFF-ZZZ	https://www.beilstein-journals.org/bjoc/articles/14/37#S3
4s		6-(1,3-dithiolan-2-ylidene)-5-methylhexan-3-one	InChI=1S/C10H16OS2/c1-3-9(11)6-8(2)7-10-12-4-5-13-10/h7-8H,3-6H2,1-2H3	UAXCQPMMEQTBAO-UHFFFAOYSA-N	Long-RInChIKey=SA-BUHFF-UAXCQPMMEQTBAO-UHFFFAOYSA-N--PVTVQVZRMFFAFP-UHFFFAOYSA-N--WEVYAHXRMPXWCK-UHFFFAOYSA-N-FEWIGMWODIRUJM-HWKANZROSA-N	Web-RInChIKey=LZVPLQHTDBOKRBNUD-NYUSWPPMLVGMNSA	Short-RInChIKey=SA-BUHFF-UAXCQPMMEQ-PVTVQVZRMF-DFAPGRGNUF-NUHFF-NUHFF-NYUSW-ZZZ	https://www.beilstein-journals.org/bjoc/articles/14/37#S4
4t		4-((1,3-dithiolan-2-ylidene)methyl)octan-2-one	InChI=1S/C12H20OS2/c1-3-4-5-11(8-10(2)13)9-12-14-6-7-15-12/h9,11H,3-8H2,1-2H3	UYKAJJCGWWOEHW-UHFFFAOYSA-N	Long-RInChIKey=SA-BUHFF-UYKAJJCGWWOEHW-UHFFFAOYSA-N--PVTVQVZRMFFAFP-UHFFFAOYSA-N--WEVYAHXRMPXWCK-UHFFFAOYSA-N-ZCFOBLITZWHNNC-VOTSOKGWSA-N	Web-RInChIKey=TVPSFGDLTFPYGCMRK-NZMGPZXJRJOMWSA	Short-RInChIKey=SA-BUHFF-UYKAJJCGWW-PVTVQVZRMF-VZXIHVCMOK-NUHFF-NUHFF-NZMGP-ZZZ	https://www.beilstein-journals.org/bjoc/articles/14/37#S4
4u		3-(1-(1,3-dithiolan-2-ylidene)propyl)cyclopentan-1-one	InChI=1S/C9H12OS2/c10-8-2-1-7(5-8)6-9-11-3-4-12-9/h6-7H,1-5H2	OQIFLRJENUJSFT-UHFFFAOYSA-N	Long-RInChIKey=SA-FUHFF-PVTVQVZRMFFAFP-UHFFFAOYSA-N--OQIFLRJENUJSFT-UHFFFAOYSA-N--WEVYAHXRMPXWCK-UHFFFAOYSA-N-BZKFMUIJRXWWQK-UHFFFAOYSA-N	Web-RInChIKey=JZFCESWRBMLZLRDJJ-NUHFFFADPSCTJSA	Short-RInChIKey=SA-FUHFF-PVTVQVZRMF-OQIFLRJENU-UUIAKDWQTA-NUHFF-NUHFF-NUHFF-ZZZ	https://www.beilstein-journals.org/bjoc/articles/14/37#S4
4v		3-((1,3-dithiolan-2-ylidene)methyl)cyclohexan-1-one	InChI=1S/C10H14OS2/c11-9-3-1-2-8(6-9)7-10-12-4-5-13-10/h7-8H,1-6H2	SGGJGNOFBJFXPU-UHFFFAOYSA-N	Long-RInChIKey=SA-BUHFF-SGGJGNOFBJFXPU-UHFFFAOYSA-N--PVTVQVZRMFFAFP-UHFFFAOYSA-N--WEVYAHXRMPXWCK-UHFFFAOYSA-N-FWFSEYBSWVRWGL-UHFFFAOYSA-N	Web-RInChIKey=LOWNNQBASMEZQRMLP-NUHFFFADPSCTJSA	Short-RInChIKey=SA-BUHFF-SGGJGNOFBJ-PVTVQVZRMF-QESJBLBJYC-NUHFF-NUHFF-NUHFF-ZZZ	https://www.beilstein-journals.org/bjoc/articles/14/37#S4
11a		6-(1,3-dithiolan-2-ylidene)-5,7-dimethylundecane-3,9-dione	InChI=1S/C16H26O2S2/c1-5-13(17)9-11(3)15(16-19-7-8-20-16)12(4)10-14(18)6-2/h11-12H,5-10H2,1-4H3	BAPCQQRWXYOJGB-UHFFFAOYSA-N	Long-RInChIKey=SA-BUHFF-BAPCQQRWXYOJGB-UHFFFAOYSA-N--PVTVQVZRMFFAFP-UHFFFAOYSA-N--WEVYAHXRMPXWCK-UHFFFAOYSA-N-FEWIGMWODIRUJM-HWKANZROSA-N	Web-RInChIKey=IRTYNWISICEPQLVHR-NYUSWPPMLVGMNSA	Short-RInChIKey=SA-BUHFF-BAPCQQRWXY-PVTVQVZRMF-DFAPGRGNUF-NUHFF-NUHFF-NYUSW-ZZZ	https://www.beilstein-journals.org/bjoc/articles/14/37#S4
11b		3,3'-((1,3-dithiolan-2-ylidene)methylene)bis(cyclopentan-1-one)	InChI=1S/C14H18O2S2/c15-11-3-1-9(7-11)13(14-17-5-6-18-14)10-2-4-12(16)8-10/h9-10H,1-8H2	DENARIJVSXWQSI-UHFFFAOYSA-N	Long-RInChIKey=SA-BUHFF-DENARIJVSXWQSI-UHFFFAOYSA-N--PVTVQVZRMFFAFP-UHFFFAOYSA-N--WEVYAHXRMPXWCK-UHFFFAOYSA-N-BZKFMUIJRXWWQK-UHFFFAOYSA-N	Web-RInChIKey=JZDDUIZOGHVIMKIEV-NUHFFFADPSCTJSA	Short-RInChIKey=SA-BUHFF-DENARIJVSX-PVTVQVZRMF-UUIAKDWQTA-NUHFF-NUHFF-NUHFF-ZZZ	https://www.beilstein-journals.org/bjoc/articles/14/37#S4
13a		Methyl 4-(1,3-dithiolan-2-ylidene)hexanoate	InChI=1S/C10H16O2S2/c1-3-8(4-5-9(11)12-2)10-13-6-7-14-10/h3-7H2,1-2H3	WEWHOQGGMKXBGI-UHFFFAOYSA-N	Long-RInChIKey=SA-BUHFF-WEWHOQGGMKXBGI-UHFFFAOYSA-N--RVLGVKMYDGKUJI-UHFFFAOYSA-N--JGHYBJVUQGTEEB-UHFFFAOYSA-M-WEVYAHXRMPXWCK-UHFFFAOYSA-N-BAPJBEWLBFYGME-UHFFFAOYSA-N	Web-RInChIKey=PBJOVBBSEDBHELCBS-MUHFFFADPSCTJSA	Short-RInChIKey=SA-BUHFF-WEWHOQGGMK-RVLGVKMYDG-GBADYYQAGH-NUHFF-NUHFF-MUHFF-ZZZ	https://www.beilstein-journals.org/bjoc/articles/14/37#S5
13b		Dimethyl 2-(1-(1,3-dithiolan-2-ylidene)propyl)succinate	InChI=1S/C12H18O4S2/c1-4-8(12-17-5-6-18-12)9(11(14)16-3)7-10(13)15-2/h9H,4-7H2,1-3H3	MRPUMAFLNFWMQI-UHFFFAOYSA-N	Long-RInChIKey=SA-BUHFF-MRPUMAFLNFWMQI-UHFFFAOYSA-N--RVLGVKMYDGKUJI-UHFFFAOYSA-N--JGHYBJVUQGTEEB-UHFFFAOYSA-M-WEVYAHXRMPXWCK-UHFFFAOYSA-N-LDCRTTXIJACKKU-ONEGZZNKSA-N	Web-RInChIKey=LYJAZRDUIUUHHXSRG-MSOPSQLMUBRWRSA	Short-RInChIKey=SA-BUHFF-MRPUMAFLNF-RVLGVKMYDG-SZTJRDIVYO-NUHFF-NUHFF-MSOPS-ZZZ	https://www.beilstein-journals.org/bjoc/articles/14/37#S5
9i		3-(Chloro(1,3-dithiolan-2-ylidene)methyl)cyclohexan-1-one	InChI=1S/C10H13ClOS2/c11-9(10-13-4-5-14-10)7-2-1-3-8(12)6-7/h7H,1-6H2	NBLKWHHUXUGJIG-UHFFFAOYSA-N	Long-RInChIKey=SA-BUHFF-NBLKWHHUXUGJIG-UHFFFAOYSA-N--UPULIXRYWSSCFI-UHFFFAOYSA-N--WEVYAHXRMPXWCK-UHFFFAOYSA-N-FWFSEYBSWVRWGL-UHFFFAOYSA-N	Web-RInChIKey=MQPSGIHHYFOODCPYI-NUHFFFADPSCTJSA	Short-RInChIKey=SA-BUHFF-NBLKWHHUXU-UPULIXRYWS-QESJBLBJYC-NUHFF-NUHFF-NUHFF-ZZZ	https://www.beilstein-journals.org/bjoc/articles/14/37#S5
9j		3-(3-Chloro-1-(1,3-dithiolan-2-ylidene)propyl)cyclohexan-1-one	InChI=1S/C12H17ClOS2/c13-5-4-11(12-15-6-7-16-12)9-2-1-3-10(14)8-9/h9H,1-8H2	XCZVBGQHMCFXSF-UHFFFAOYSA-N	Long-RInChIKey=SA-BUHFF-XCZVBGQHMCFXSF-UHFFFAOYSA-N--ZHXQSLYYXTXAMV-UHFFFAOYSA-N--WEVYAHXRMPXWCK-UHFFFAOYSA-N-FWFSEYBSWVRWGL-UHFFFAOYSA-N	Web-RInChIKey=YTPRZRVSSKGELXGVD-NUHFFFADPSCTJSA	Short-RInChIKey=SA-BUHFF-XCZVBGQHMC-ZHXQSLYYXT-QESJBLBJYC-NUHFF-NUHFF-NUHFF-ZZZ	https://www.beilstein-journals.org/bjoc/articles/14/37#S5
16a		Methyl 4-(1,3-dithiolan-2-ylidene)hexanoate	InChI=1S/C14H18OS2/c1-11(15)7-8-13(14-16-9-10-17-14)12-5-3-2-4-6-12/h2-6,11,15H,7-10H2,1H3	OOECJNICVMRHHH-UHFFFAOYSA-N	Long-RInChIKey=SA-FUHFF-LXKWSUYFYQCLRX-UHFFFAOYSA-N--OOECJNICVMRHHH-UHFFFAOYSA-N--YOQDYZUWIQVZSF-UHFFFAOYSA-N-OKKJLVBELUTLKV-UHFFFAOYSA-N	Web-RInChIKey=OMYSWJVBXPKYMEYSR-NUHFFFADPSCTJSA	Short-RInChIKey=SA-FUHFF-LXKWSUYFYQ-OOECJNICVM-ULRFGOIYKM-NUHFF-NUHFF-NUHFF-ZZZ	https://www.beilstein-journals.org/bjoc/articles/14/37#S5
16b		5-(1,3-dithiolan-2-ylidene)-4-methyl-5-phenylpentan-2-ol	InChI=1S/C15H20OS2/c1-11(10-12(2)16)14(15-17-8-9-18-15)13-6-4-3-5-7-13/h3-7,11-12,16H,8-10H2,1-2H3	IECVTZNNDJQHMF-UHFFFAOYSA-N	Long-RInChIKey=SA-FUHFF-RCALJRZMLQRHLX-UHFFFAOYSA-N--IECVTZNNDJQHMF-UHFFFAOYSA-N--YOQDYZUWIQVZSF-UHFFFAOYSA-N-OKKJLVBELUTLKV-UHFFFAOYSA-N	Web-RInChIKey=MOEWVGVMHKGFJNDEK-NUHFFFADPSCTJSA	Short-RInChIKey=SA-FUHFF-RCALJRZMLQ-IECVTZNNDJ-ULRFGOIYKM-NUHFF-NUHFF-NUHFF-ZZZ	https://www.beilstein-journals.org/bjoc/articles/14/37#S5
15		(R)-4-(1,3-dithiolan-2-ylidene)-3-methyl-1-phenylhexan-1-one	InChI=1S/C21H22OS2/c1-2-18(21-23-13-14-24-21)19(16-9-5-3-6-10-16)15-20(22)17-11-7-4-8-12-17/h3-12,19H,2,13-15H2,1H3/t19-/m0/s1	FFNUZHPVLBYLFF-IBGZPJMESA-N	Long-RInChIKey=SA-BUHFF-FFNUZHPVLBYLFF-IBGZPJMESA-N--RVLGVKMYDGKUJI-UHFFFAOYSA-N--ZJYBJIIJQZUJAO-IUGZDUDYSA-N-WEVYAHXRMPXWCK-UHFFFAOYSA-N	Web-RInChIKey=XTXMFWRUTCFKAGZZM-NGJPZDJZTSHIRSA	Short-RInChIKey=SA-BUHFF-FFNUZHPVLB-RVLGVKMYDG-HGJUFIXWCH-NXKPG-NUHFF-NQAWY-ZZZ	https://www.beilstein-journals.org/bjoc/articles/14/37#S5
7e		S-(3-((2-methyl-5-oxohexan-3-yl)thio)propyl) 2-phenylethanethioate	InChI=1S/C18H26O2S2/c1-14(2)17(12-15(3)19)21-10-7-11-22-18(20)13-16-8-5-4-6-9-16/h4-6,8-9,14,17H,7,10-13H2,1-3H3	HAPMDIPOMSAKCB-UHFFFAOYSA-N	Long-RInChIKey=SA-FUHFF-BHINIDDJDWBSFF-UHFFFAOYSA-N--HAPMDIPOMSAKCB-UHFFFAOYSA-N--WEVYAHXRMPXWCK-UHFFFAOYSA-N-IYMKNYVCXUEFJE-SNAWJCMRSA-N	Web-RInChIKey=WOHRNDUKJFVCEZHRW-NIEKNUMXMTBCPSA	Short-RInChIKey=SA-FUHFF-BHINIDDJDW-HAPMDIPOMS-GWVHZPNOTS-NUHFF-NUHFF-NIEKN-ZZZ	https://www.beilstein-journals.org/bjoc/articles/14/37#S2
7j		S-(3-((2-methyl-5-oxohexan-3-yl)thio)propyl) propanethioate	InChI=1S/C13H24O2S2/c1-5-13(15)17-8-6-7-16-12(10(2)3)9-11(4)14/h10,12H,5-9H2,1-4H3	LGBVJUDEOLYQDS-UHFFFAOYSA-N	Long-RInChIKey=SA-BUHFF-LGBVJUDEOLYQDS-UHFFFAOYSA-N--ASRVTQYPLUHROH-UHFFFAOYSA-N--WEVYAHXRMPXWCK-UHFFFAOYSA-N-IYMKNYVCXUEFJE-SNAWJCMRSA-N	Web-RInChIKey=QEAIXSBQOCOILQYET-NIEKNUMXMTBCPSA	Short-RInChIKey=SA-BUHFF-LGBVJUDEOL-ASRVTQYPLU-GWVHZPNOTS-NUHFF-NUHFF-NIEKN-ZZZ	https://www.beilstein-journals.org/bjoc/articles/14/37#S2
7m		S-(3-((3-oxopentyl)thio)propyl) butanethioate	InChI=1S/C12H22O2S2/c1-3-6-12(14)16-9-5-8-15-10-7-11(13)4-2/h3-10H2,1-2H3	ZYLZEQDDPVIRMC-UHFFFAOYSA-N	Long-RInChIKey=SA-BUHFF-ZYLZEQDDPVIRMC-UHFFFAOYSA-N--AOGWEVBUOWKZRY-UHFFFAOYSA-N--WEVYAHXRMPXWCK-UHFFFAOYSA-N-JLIDVCMBCGBIEY-UHFFFAOYSA-N	Web-RInChIKey=CYTAWKVYHWJXMTGUT-NUHFFFADPSCTJSA	Short-RInChIKey=SA-BUHFF-ZYLZEQDDPV-AOGWEVBUOW-GOQWUCBPXP-NUHFF-NUHFF-NUHFF-ZZZ	https://www.beilstein-journals.org/bjoc/articles/14/37#S2
7n		S-(3-((4-oxohexan-2-yl)thio)propyl) butanethioate	InChI=1S/C13H24O2S2/c1-4-7-13(15)17-9-6-8-16-11(3)10-12(14)5-2/h11H,4-10H2,1-3H3	YHZSWQASJCLPOE-UHFFFAOYSA-N	Long-RInChIKey=SA-BUHFF-YHZSWQASJCLPOE-UHFFFAOYSA-N--AOGWEVBUOWKZRY-UHFFFAOYSA-N--WEVYAHXRMPXWCK-UHFFFAOYSA-N-FEWIGMWODIRUJM-HWKANZROSA-N	Web-RInChIKey=YGUDSHNXSJKZLQSKZ-NBYZWMAHKLZBOSA	Short-RInChIKey=SA-BUHFF-YHZSWQASJC-AOGWEVBUOW-DFAPGRGNUF-NUHFF-NUHFF-NYUSW-ZZZ	https://www.beilstein-journals.org/bjoc/articles/14/37#S2
